# Supplementary material for: 3D Culture Systems for Exploring Cancer Immunology
Source: PubMed Central journal article supplement (PMC7795162; doi:10.3390/cancers13010056), 2020-12-28
Supplement: cancers-13-00056-s001.pdf [file cancers-13-00056-s001.pdf]

**Supplementary Table S1.** Summary of references categorized by 3D culture system used and field of cancer immunology investigated.

| <b>Spheroids</b>                        |                     |                                                                                                                                                                             |
|-----------------------------------------|---------------------|-----------------------------------------------------------------------------------------------------------------------------------------------------------------------------|
| <i>Immunotherapy Penetrance</i>         |                     |                                                                                                                                                                             |
| Reference #                             | Authors             | Article Title                                                                                                                                                               |
| 35                                      | Liu et al.          | MALDI-MSI of Immunotherapy: Mapping the EGFR-Targeting Antibody Cetuximab in 3D Colon-Cancer Cell Cultures.                                                                 |
| 36                                      | Rodallec et al.     | From 3D spheroids to tumor bearing mice: efficacy and distribution studies of trastuzumab-docetaxel immunoliposome in breast cancer.                                        |
| <i>Lymphocyte Infiltration</i>          |                     |                                                                                                                                                                             |
| 38                                      | Mark et al.         | Cryopreservation impairs 3-D migration and cytotoxicity of natural killer cells.                                                                                            |
| 39                                      | Crouau et al.       | Cocultures of human colorectal tumor spheroids with immune cells reveal the therapeutic potential of MICA/B and NKG2A targeting for cancer treatment                        |
| <b>Tumor Dormancy/Immunosuppression</b> |                     |                                                                                                                                                                             |
| 44                                      | Liu et al.          | Blockade of IDO-kynurenine-AhR metabolic circuitry abrogates IFN- $\gamma$ -induced immunologic dormancy of tumor-repopulating cells.                                       |
| 45                                      | Stüber et al.       | Inhibition of TGF- $\beta$ - Receptor signaling augments the antitumor function of ROR1-specific CAR T-cells against triple-negative breast cancer.                         |
| 46                                      | Raghavan et al.     | Ovarian cancer stem cells and macrophages reciprocally interact through the WNT pathway to promote pro-tumoral and malignant phenotypes in 3D engineered microenvironments. |
| 47                                      | Kuen et al.         | Pancreatic cancer cell/fibroblast co-culture induces M2 like macrophages that influence therapeutic response in a 3D model.                                                 |
| 48                                      | Chandrakesan et al. | DCLK1-Isoform2 Alternative Splice Variant Promotes Pancreatic Tumor Immunosuppressive M2-Macrophage Polarization.                                                           |
| 58                                      | Rocha et al.        | 3D Cellular Architecture Affects MicroRNA and Protein Cargo of Extracellular Vesicles.                                                                                      |
| 59                                      | Thippabhotla et al. | 3D cell culture stimulates the secretion of in vivo like extracellular vesicles.                                                                                            |
| 60                                      | Muller et al.       | Human tumor-derived exosomes (TEX) regulate Treg functions via cell surface signaling rather than uptake mechanisms.                                                        |
| <b>Organoids</b>                        |                     |                                                                                                                                                                             |
| <i>Antigen Presentation</i>             |                     |                                                                                                                                                                             |
| 61                                      | Chakrabarti et al.  | Hedgehog signaling induces PD-L1 expression and tumor cell proliferation in gastric cancer.                                                                                 |
| 62                                      | Dijkstra et al      | Generation of Tumor-Reactive T Cells by Co-culture of Peripheral Blood Lymphocytes and Tumor Organoids.                                                                     |
| <i>Fibroblast-Cancer Interactions</i>   |                     |                                                                                                                                                                             |
| 65                                      | Tsai et al.         | Development of primary human pancreatic cancer organoids, matched stromal and immune cells and 3D tumor microenvironment models.                                            |
| 66                                      | Rhee et al.         | Fibroblasts in three dimensional matrices: Cell migration and matrix remodeling.                                                                                            |

|                                                  |                     |                                                                                                                                       |
|--------------------------------------------------|---------------------|---------------------------------------------------------------------------------------------------------------------------------------|
| 67                                               | Hanley et al.       | Tumor resident stromal cells promote breast cancer invasion through regulation of the basal phenotype.                                |
| 68                                               | Oszvald et al.      | Fibroblast-Derived Extracellular Vesicles Induce Colorectal Cancer Progression by Transmitting Amphiregulin.                          |
| 69                                               | Liu et al.          | Cancer-Associated Fibroblasts Provide a Stromal Niche for Liver Cancer Organoids That Confers Trophic Effects and Therapy Resistance. |
| <i>CAR Cell Development</i>                      |                     |                                                                                                                                       |
| 18                                               | Dillard et al.      | Colorectal cysts as a validating tool for CAR therapy.                                                                                |
| 72                                               | Leuci et al.        | CSPG4-Specific CAR.CIK Lymphocytes as a Novel Therapy for the Treatment of Multiple Soft-Tissue Sarcoma Histotypes                    |
| 73                                               | Jacob et al.        | A Patient-Derived Glioblastoma Organoid Model and Biobank Recapitulates Inter- and Intra-tumoral Heterogeneity.                       |
| 75                                               | Schnalzger et al.   | 3D model for CAR-mediated cytotoxicity using patient-derived colorectal cancer organoids.                                             |
| <i>Personalized Immunotherapy Testing</i>        |                     |                                                                                                                                       |
| 79                                               | Votanopoulos et al. | Model of Patient-Specific Immune-Enhanced Organoids for Immunotherapy Screening: Feasibility Study.                                   |
| 80                                               | Neal et al.         | Organoid Modeling of the Tumor Immune Microenvironment.                                                                               |
| <b>Microfluidic Chips</b>                        |                     |                                                                                                                                       |
| <i>Immune Checkpoints</i>                        |                     |                                                                                                                                       |
| 81                                               | Jenkins et al.      | Ex vivo profiling of PD-1 blockade using organotypic tumor spheroids.                                                                 |
| 84                                               | Diskin et al.       | PD-L1 engagement on T cells promotes self-tolerance and suppression of neighboring macrophages and effector T cells in cancer.        |
| 85                                               | Schmidt et al.      | Assessment of Clinical Activity of PD-1 Checkpoint Inhibitor Combination Therapies Reported in Clinical Trials.                       |
| <i>Migration, Extravasation and Angiogenesis</i> |                     |                                                                                                                                       |
| 88                                               | Mascolo et al.      | Nanoformulated Zoledronic Acid Boosts the V $\delta$ 2 T Cell Immunotherapeutic Potential in Colorectal Cancer.                       |
| 89                                               | Aung et al.         | An Engineered Tumor-on-a-Chip Device with Breast Cancer-Immune Cell Interactions for Assessing T-cell Recruitment.                    |
| 90                                               | Cui et al.          | Hacking macrophage-associated immunosuppression for regulating glioblastoma angiogenesis.                                             |
